# Supplementary material
Source: publisher figshare collection journal article supplement (https://diabetesjournals.figshare.com/articles/dataset/_/27047923)
Supplement: Supplementary file 1 [file 1]

## Supplement 1: Meta-Analysis Search Strategy

### PubMed 387 Articles

#### Integrated Care Models:

"comprehensive care"[tiab] OR "interdisciplinary care"[tiab] OR "integrated care"[tiab] OR "integrated healthcare"[tiab] OR "integrated behavioral health\*"[tiab] OR "primary care behavioral health"[tiab] OR "primary healthcare"[tiab] OR "integrated health care"[tiab] OR "collaborative care"[tiab] OR CoCM OR "Delivery of Health Care, Integrated"[Mesh]

**Diabetes:** (diabetes OR "hemoglobin A1C" OR A1C OR "glycated hemoglobin" OR "Diabetes Mellitus"[Mesh] OR "Glycated Hemoglobin"[Mesh])

**Behavioral Intervention:** ("psychotherapy" [tiab] OR "therap\*" [tiab] OR "counsel\*" [tiab] OR "behavioral intervention"[tiab] OR "behavioral therapy" [tiab] OR "behavioral psychotherapy" [tiab] OR "psychosocial intervention"[tiab] OR "solution focused" [tiab] OR "SFBT" [tiab] OR "behavioral activation"[tiab] OR "brief action planning" [tiab] OR "Psychosocial Intervention"[Mesh] OR "Behavior Therapy"[Mesh] OR "Psychotherapy, Brief"[Mesh])

**Depression:** "Depression"[Mesh] OR "Affective Symptoms"[Mesh] OR "Depressive Disorder"[Mesh] OR "Depressive Disorder, Major"[Mesh] OR "Dysthymic Disorder"[Mesh] OR "Mood Disorders"[Mesh] OR depress\*[tiab] OR affective symptom\* [tiab] OR dysthymi\* [tiab] OR affective disorder\* [tiab] OR mood disorder\* [tiab]

### PsycINFO: 65 Articles

**Integrated Care Models:** "integrated care" OR "integrated behavioral health\*" OR "collaborative care" OR CoCM OR "primary care behavioral health" OR PCBH OR "primary care" OR "primary health care" OR "primary healthcare" OR "MM "Integrated Services"

**Diabetes:** diabetes OR "hemoglobin A1C" OR A1C OR "glycated hemoglobin" OR MM "Diabetes" OR MM "Diabetes Mellitus"

**Behavioral Intervention:** (therap\* OR counsel\* OR "behavioral intervention" OR "psychosocial intervention" OR "solution focused" OR SFBT OR "behavioral activation" OR "brief action planning" OR MM "Brief Interventions" OR MM "Brief Psychotherapy" OR MM "Behavioral Health Services" OR MM "Behavioral Medicine")

**Depression:** DE="Depression (Emotion)" OR DE="Major Depression" OR DE="Dysthymic Disorder" OR KW=Dysthymi\* OR KW=depress\* OR KW=affective\* disorder\*

## CINAHL: 0 Articles

### Integrated Care Models:

"comprehensive care"[tw] OR "interdisciplinary care"[tw] OR "integrated care"[tw] OR "integrated healthcare"[tw] OR "integrated behavioral health\*"[tw] OR "primary care behavioral health"[tw] OR "primary healthcare"[tw] OR "integrated health care"[tw] OR "collaborative care"[tw] OR CoCM OR MM "Health Care Delivery, Integrated")

**Diabetes:** (diabetes OR "hemoglobin A1C" OR A1C OR "glycated hemoglobin" OR (MM "Diabetes Mellitus, Type 1/PF/TH") OR (MM "Diabetes Mellitus, Type 2/PF/PC/TH"))

**Behavioral Intervention:** (psychotherapy OR therap\* OR counsel\* OR "behavioral intervention"[tw] OR "behavioral therapy [tw]" OR "behavioral psychotherapy" [tw] OR "psychosocial intervention"[tw] OR "solution focused"[tw] OR SFBT OR "behavioral activation"[tw] OR "brief action planning")[tw] OR MM "Psychosocial Intervention")

**Depression:** (MM "Depression") OR (MM "Depression, Reactive/PF" OR depress\*[tw] OR affective symptom\* [tw] OR dysthymi\* [tw] OR affective disorder\* [tw] OR mood disorder\* [tw])

## PROQUEST: 65 Articles

**Integrated care:** MAINSUBJECT.EXACT("Integrated approach") OR MAINSUBJECT.EXACT("Primary care") OR MAINSUBJECT.EXACT("Integrated delivery systems")) OR title("comprehensive care" OR "interdisciplinary care" OR "integrated care" OR "integrated healthcare" OR "integrated behavioral health\*" OR "primary care behavioral health" OR "primary healthcare" OR "integrated health care" OR "collaborative care" OR "CoCM" ) OR abstract("comprehensive care" OR "interdisciplinary care" OR "integrated care" OR "integrated healthcare" OR "integrated behavioral health\*" OR "primary care behavioral health" OR "primary healthcare" OR "integrated health care" OR "collaborative care" OR "CoCM" )

**Diabetes:** MAINSUBJECT.EXACT("Diabetes") OR title("diabetes "OR "hemoglobin A1C" OR "A1C" OR "glycated hemoglobin" OR "Diabetes Mellitus" ) OR abstract("diabetes "OR "hemoglobin A1C" OR "A1C" OR "glycated hemoglobin" OR "Diabetes Mellitus" )

**Behavioral Intervention:** (MAINSUBJECT.EXACT("Therapy") OR MAINSUBJECT.EXACT("Psychotherapy research") OR MAINSUBJECT.EXACT("Cognitive therapy") OR MAINSUBJECT.EXACT("Group therapy") OR MAINSUBJECT.EXACT("Psychotherapy")) OR abstract(("psychotherapy" OR "therap\*" OR "counsel\*" OR "behavioral intervention" OR "behavioral therapy" OR "behavioral psychotherapy" OR "psychosocial intervention" OR "solution focused" OR "SFBT" OR "behavioral activation" OR "brief action planning" OR "Psychosocial Intervention" OR "Behavior Therapy")) AND title(("psychotherapy" OR "therap\*" OR "counsel\*" OR "behavioral intervention" OR "behavioral therapy" OR "behavioral psychotherapy" OR "psychosocial intervention" OR "solution focused" OR "SFBT" OR "behavioral activation" OR "brief action planning" OR "Psychosocial Intervention" OR "Behavior Therapy"))

**Depression:** (MAINSUBJECT.EXACT("Affect (Psychology)") OR  
MAINSUBJECT.EXACT("Mental depression")) OR abstract("Depression" OR "Affective  
Symptoms" OR "Depressive Disorder" OR "Depressive Disorder, Major" OR "Dysthymic  
Disorder" OR "Mood Disorders" OR depress\* OR affective symptom\* OR dysthymi\* OR  
affective disorder\* OR mood disorder\*) OR title("Depression" OR "Affective Symptoms" OR  
"Depressive Disorder" OR "Depressive Disorder, Major" OR "Dysthymic Disorder" OR "Mood  
Disorders" OR depress\* OR affective symptom\* OR dysthymi\* OR affective disorder\* OR  
mood disorder\*)
