# Supplementary material
Source: publisher figshare collection journal article supplement (https://diabetesjournals.figshare.com/articles/dataset/_/27047923)

## Supplement 4: Sensitivity Analyses Stratified by Intervention Focus

### Focus Sensitivity Analysis 1: Diabetes and Depression Focused, HbA1c Results

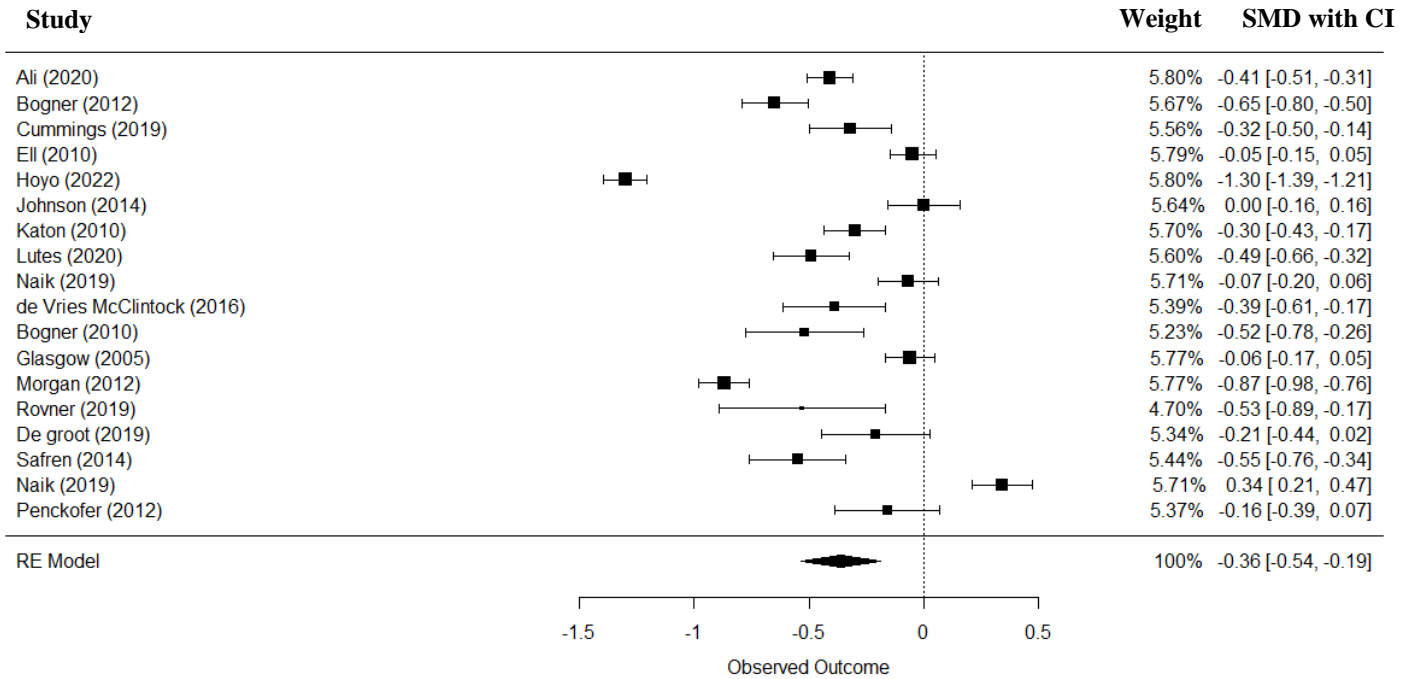

### Focus Sensitivity Analysis 2: Depression Focused, HbA1c Results

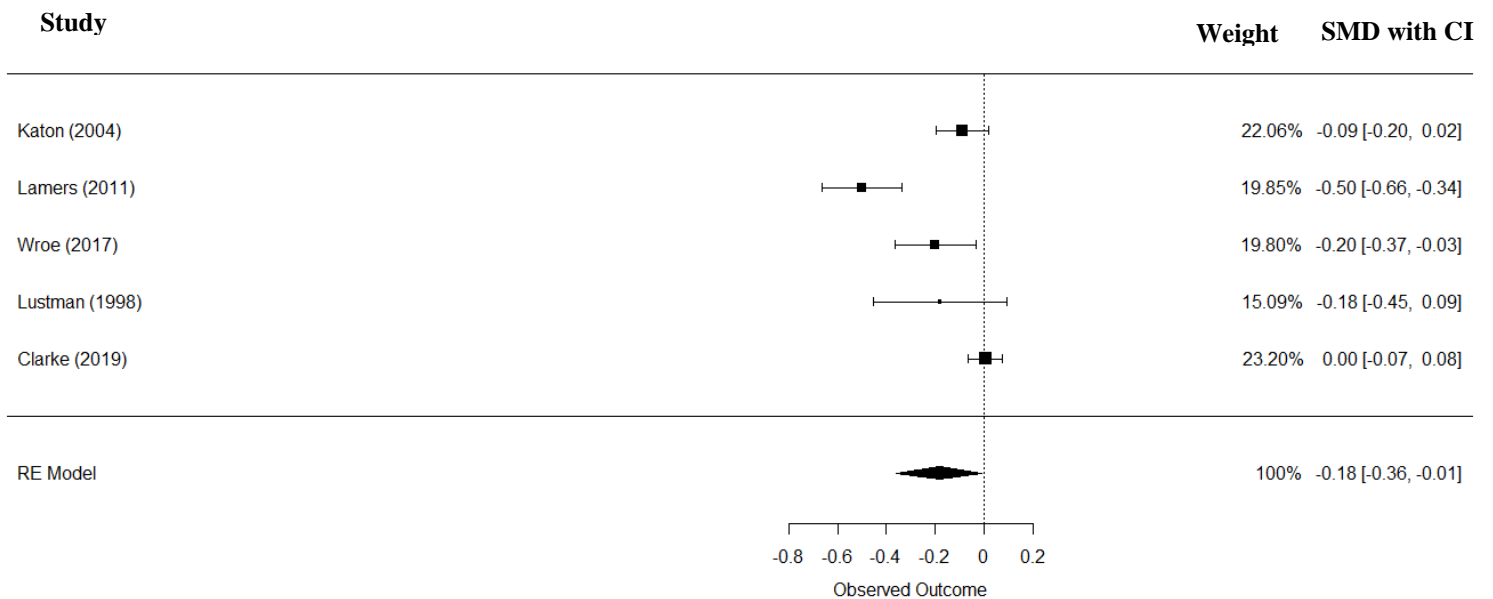

Focus Sensitivity Analysis 3: Diabetes Focused, HbA1c Results

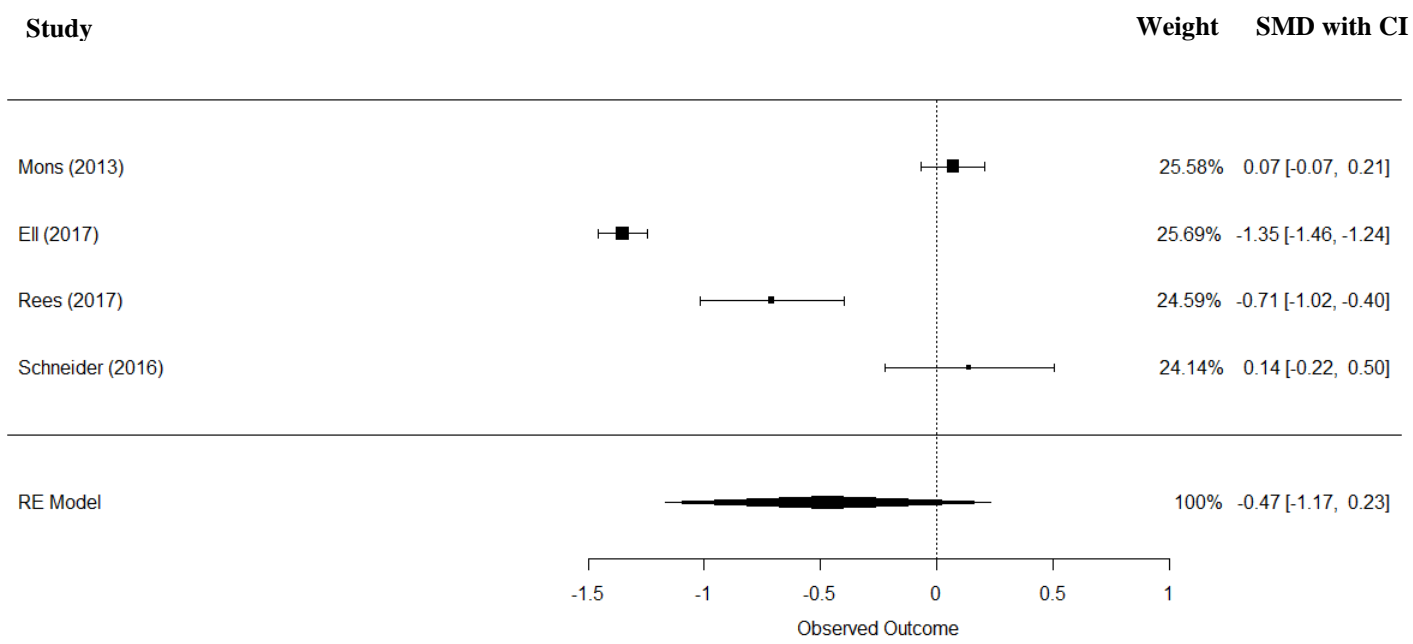

Focus Sensitivity Analysis 4: Diabetes and Depression Focused, Depression Results

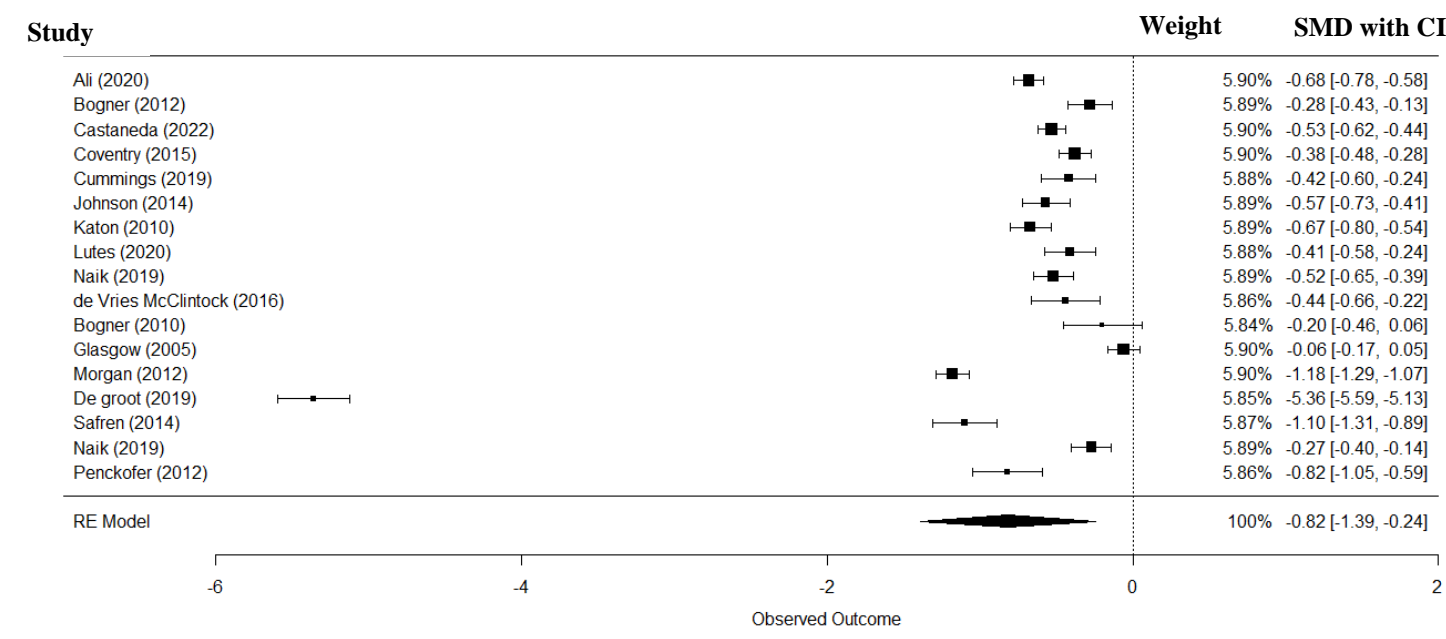

Focus Sensitivity Analysis 5: Depression Focused, Depression Results

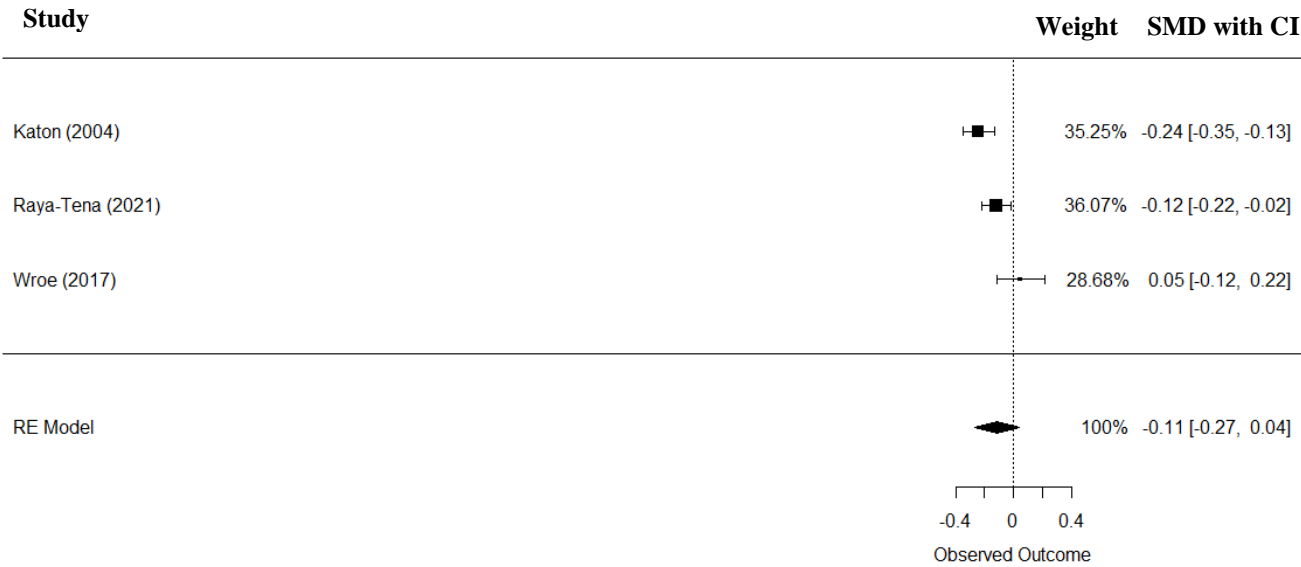

Focus Sensitivity Analysis 6: Diabetes Focused, Depression Results

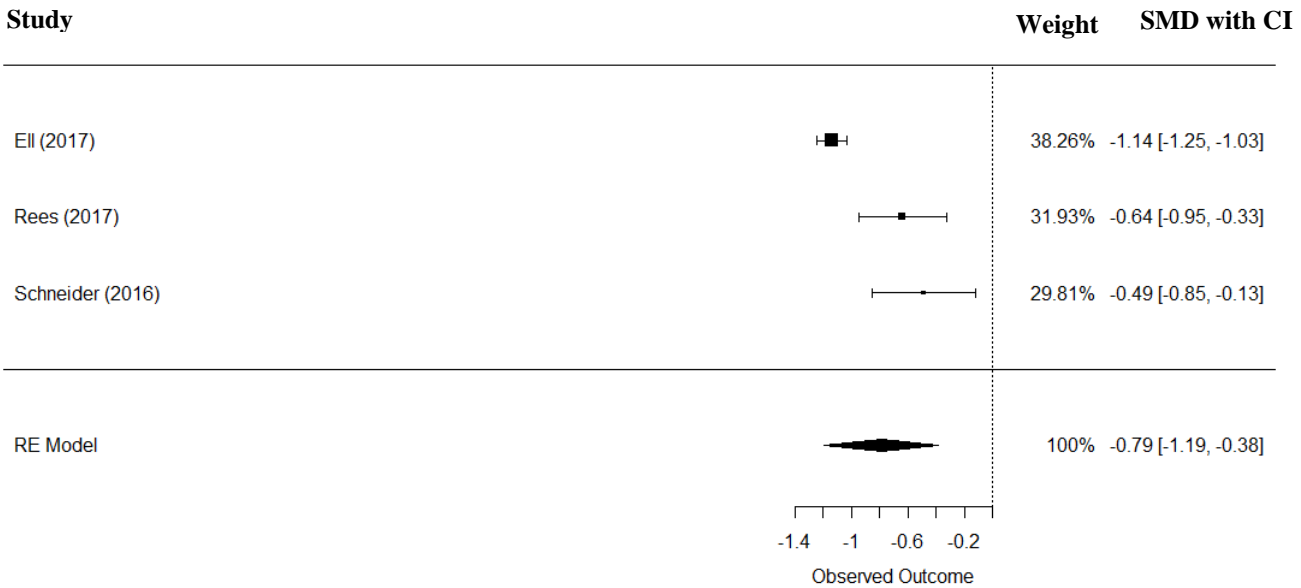

Supplement: Supplementary file 2 [file 1]
