# Supplementary material
Source: publisher figshare collection journal article supplement (https://diabetesjournals.figshare.com/articles/dataset/_/27047923)
Supplement: Supplementary file 3 [file 1]

|    | A                | B         | C        | D        | E                 | F            | G                  | H                       | I                                          |
|----|------------------|-----------|----------|----------|-------------------|--------------|--------------------|-------------------------|--------------------------------------------|
| 1  |                  |           |          |          |                   |              |                    |                         |                                            |
| 2  | Time             | Unique ID | Assessor | Study ID | Reference         | Experimental | Comparator         | Outcome                 | Results                                    |
| 3  | 2024/08/08 09.09 | 1         | Z.C.     | 1        | Ali (2020)        | yes          | treatment as usual | HbA1c and Depression    |                                            |
| 4  | 2024/08/08 09.28 | 2         | ZC       | 2        | Bogner (2010)     | yes          | treatment as usual | HbA1c and Depression    | HbA1c: d= -.052; Depression: d= -.052      |
| 5  | 2024/08/08 09.17 | 3         | ZC       | 3        | Bogner (2012)     | intervention | TAU                | A1C and depression      | A1C: d= -0.65; Depression: d= -0.65        |
| 6  | 2024/08/08 09.18 | 4         | ZC       | 4        | Castaneda (2022)  | intervention | TAU                | Depression              | d= -0.86                                   |
| 7  | 2024/08/08 09.23 | 5         | ZC       | 5        | Clarke (2019)     | Intervention | Active Control     | Depression              | d= 0.01                                    |
| 8  | 2024/08/08 09.33 | 6         | ZC       | 6        | Coventry (2014)   | CoCM         | TAU                | depression              | Cohens d= -0.40                            |
| 9  | 2024/08/08 09.32 | 7         | ZC       | 7        | Cummings (2019)   | CoCM         | TAU                | Depression and A1C      | A1C: Cohens d= -0.32; Depression: d= -0.32 |
| 10 | 2024/08/08 09.36 | 8         | ZC       | 8        | De Groot (2019)   | intervention | TAU                | A1C and depression      | A1C: Cohens d= -0.21; Depression: d= -0.21 |
| 11 | 2024/08/08 09.39 | 10        | ZC       | 10       | Ell (2010)        | intervention | tau                | A1C and Depression      | A1C: Cohens d= -0.05; Depression: d= -0.05 |
| 12 | 2024/08/08 09.45 | 11        | ZC       | 11       | Ell (2017)        | Intervention | TAU                | A1C and depression      | A1C: Cohens d= -1.35 Depression: d= -1.35  |
| 13 | 2024/08/08 09.46 | 12        | ZC       | 12       | Glassgow (2006)   | intervention | tau                | Diabetes and Depression | A1C: d= -0.06; Depression: d= -0.06        |
| 14 | 2024/08/08 09.48 | 13        | ZC       | 13       | Hoyo (2022)       | intervention | tau                | A1C                     | Cohens d= -1.30                            |
| 15 | 2024/08/08 09.51 | 14        | ZC       | 14       | Ismail (2018)     | intervention | tau                | A1C and Depression      | A1C:Cohens d= -0.79 Depression: d= -0.79   |
| 16 | 2024/08/08 09.53 | 15        | ZC       | 15       | Johnson (2014)    | intervention | tau                | A1C and Depression      | A1C:Cohens d= -0.01 Depression: d= -0.01   |
| 17 | 2024/08/08 09.58 | 16        | ZC       | 16       | Katon (2004)      | Intervention | TAU                |                         |                                            |
| 18 | 2024/08/08 10.01 | 17        | ZC       | 17       | Katon (2010)      | Intervention | Treatment as Usual | Depression and diabetes | HbA1c:-0.30 Depression: d= -0.30           |
| 19 | 2024/08/08 10.03 | 18        | ZC       | 18       | Lamers (2011)     | Intervention | Treatment as Usual | A1C and Depression      | A1C: -0.30, Depression: -0.30              |
| 20 | 2024/08/08 10.04 | 19        | ZC       | 19       | Lustman (1998)    | Intervention | Treatment as Usual | A1C                     | -0.18                                      |
| 21 | 2024/08/08 10.06 | 20        | ZC       | 20       | Lutes (2020)      | Intervention | TAU                | Depression and Diabetes | depression: -0.49 diabetes: -0.49          |
| 22 | 2024/08/08 10.08 | 21        | ZC       | 21       | Mons (2013)       | Intervention | TAU                | Diabetes                | 0.07                                       |
| 23 | 2024/08/08 10.12 | 22        | ZC       | 22       | Morgan (2013)     | Intervention | TAU                | A1C and depression      | A1C: -0.87, Depression: -0.87              |
| 24 | 2024/08/08 10.16 | 23        | ZC       | 23       | Naik (2019)       | Intervention | TAU                | Depression and A1C      | Depression: -0.52, Diabetes: -0.52         |
| 25 | 2024/08/08 10.18 | 24        | ZC       | 24       | Penckofer (2012)  | Intervention | TAU                | A1C and Depression      | A1C: -0.16, Depression: -0.16              |
| 26 | 2024/08/08 10.22 | 25        | ZC       | 25       | Piette (2011)     | Intervention | TAU                | A1C and Depression      | A1C: 0.11, Depression: -0.11               |
| 27 | 2024/08/08 10.24 | 26        | ZC       | 26       | Raya Tena (2021)  | Intervention | TAU                | Depression              | -0.44                                      |
| 28 | 2024/08/08 10.31 | 27        | ZC       | 27       | Rees (2017)       | Intervention | TAU                | Depression and A1C      | Depression: -0.64; Diabetes: -0.64         |
| 29 | 2024/08/08 10.34 | 28        | ZC       | 28       | Rovner (2019)     | Intervention | TAU                | A1C                     | -0.53                                      |
| 30 | 2024/04/26 12.03 | 29        | ZC       | 29       | Safren            | Intervention | TAU                | A1C and Depression      | A1C:-0.55, Depression: -0.55               |
| 31 | 2024/08/08 10.37 | 30        | ZC       | 30       | Schneider (2016)  | Intervention | TAU                | Diabetes and Depression | Diabetes: 0.14, Depression: 0.14           |
| 32 | 2024/08/08 10.39 | 31        | ZC       | 31       | Srinivasan (2022) | Intervention | TAU                | Depression              | -0.22                                      |
| 33 | 2024/08/08 10.41 | 32        | ZC       | 32       | Wroe (2018)       | Intervention | TAU                | Depression and Diabetes | Depression: 0.05, Diabetes: 0.05           |

|    | J                                                            | K                         | L             |
|----|--------------------------------------------------------------|---------------------------|---------------|
| 1  | <b>Basic information</b>                                     |                           |               |
| 2  | <b>Aim</b>                                                   | <b>Effect of adhering</b> | <b>Weight</b> |
| 3  | assignment to intervention (the 'intention-to-treat' effect) | NA                        | 1             |
| 4  | assignment to intervention (the 'intention-to-treat' effect) | NA                        | 1             |
| 5  | assignment to intervention (the 'intention-to-treat' effect) | NA                        | 1             |
| 6  | assignment to intervention (the 'intention-to-treat' effect) | NA                        | 1             |
| 7  | assignment to intervention (the 'intention-to-treat' effect) | NA                        | 1             |
| 8  | assignment to intervention (the 'intention-to-treat' effect) | NA                        | 1             |
| 9  | assignment to intervention (the 'intention-to-treat' effect) | NA                        | 1             |
| 10 | assignment to intervention (the 'intention-to-treat' effect) | NA                        | 1             |
| 11 | assignment to intervention (the 'intention-to-treat' effect) | NA                        | 1             |
| 12 | assignment to intervention (the 'intention-to-treat' effect) | NA                        | 1             |
| 13 | assignment to intervention (the 'intention-to-treat' effect) | NA                        | 1             |
| 14 | assignment to intervention (the 'intention-to-treat' effect) | NA                        | 1             |
| 15 | assignment to intervention (the 'intention-to-treat' effect) | NA                        | 1             |
| 16 | assignment to intervention (the 'intention-to-treat' effect) | NA                        | 1             |
| 17 | assignment to intervention (the 'intention-to-treat' effect) | NA                        | 1             |
| 18 | assignment to intervention (the 'intention-to-treat' effect) | NA                        | 1             |
| 19 | assignment to intervention (the 'intention-to-treat' effect) | NA                        | 1             |
| 20 | assignment to intervention (the 'intention-to-treat' effect) | NA                        | 1             |
| 21 | assignment to intervention (the 'intention-to-treat' effect) | NA                        | 1             |
| 22 | assignment to intervention (the 'intention-to-treat' effect) | NA                        | 1             |
| 23 | assignment to intervention (the 'intention-to-treat' effect) | NA                        | 1             |
| 24 | assignment to intervention (the 'intention-to-treat' effect) | NA                        | 1             |
| 25 | assignment to intervention (the 'intention-to-treat' effect) | NA                        | 1             |
| 26 | assignment to intervention (the 'intention-to-treat' effect) | NA                        | 1             |
| 27 | assignment to intervention (the 'intention-to-treat' effect) | NA                        | 1             |
| 28 | assignment to intervention (the 'intention-to-treat' effect) | NA                        | 1             |
| 29 | assignment to intervention (the 'intention-to-treat' effect) | NA                        | 1             |
| 30 | assignment to intervention (the 'intention-to-treat' effect) | NA                        | 1             |
| 31 | assignment to intervention (the 'intention-to-treat' effect) | NA                        | 1             |
| 32 | assignment to intervention (the 'intention-to-treat' effect) | NA                        | 1             |
| 33 | assignment to intervention (the 'intention-to-treat' effect) | NA                        | 1             |

|    | M                  | N                               | O   | P                            | Q   | R            | S                    | T                        |
|----|--------------------|---------------------------------|-----|------------------------------|-----|--------------|----------------------|--------------------------|
| 1  |                    | Domain 1. Randomization process |     |                              |     |              |                      |                          |
| 2  | Sources            | 1.1                             | 1.2 | Note for 1.1&1.2             | 1.3 | Note for 1.3 | 1.0 Algorithm result | 1.0 Assessor's Judgement |
| 3  | Journal article(s) | Y                               | Y   |                              | N   |              | Low                  |                          |
| 4  | Journal article(s) | Y                               | Y   |                              | N   |              | Low                  |                          |
| 5  | Journal article(s) | Y                               | Y   |                              | N   |              | Low                  |                          |
| 6  | Journal article(s) | Y                               | Y   |                              | N   |              | Low                  |                          |
| 7  | Journal article(s) | Y                               | Y   |                              | N   |              | Low                  |                          |
| 8  | Journal article(s) | Y                               | Y   | general diabetes, does not s | N   |              | Low                  |                          |
| 9  | Journal article(s) | Y                               | Y   |                              | N   |              | Low                  |                          |
| 10 | Journal article(s) | Y                               | Y   |                              | N   |              | Low                  |                          |
| 11 | Journal article(s) | Y                               | Y   |                              | N   |              | Low                  |                          |
| 12 | Journal article(s) | Y                               | Y   |                              | N   |              | Low                  |                          |
| 13 | Journal article(s) | Y                               | Y   |                              | PN  |              | Low                  |                          |
| 14 | Journal article(s) | Y                               | Y   |                              | N   |              | Low                  |                          |
| 15 | Journal article(s) | Y                               | Y   |                              | N   |              | Low                  |                          |
| 16 |                    | Y                               | Y   |                              | N   |              | Low                  |                          |
| 17 | Journal article(s) | Y                               | Y   |                              | N   |              | Low                  |                          |
| 18 | Journal article(s) | Y                               | Y   |                              | N   |              | Low                  |                          |
| 19 | Journal article(s) | Y                               | Y   |                              | N   |              | Low                  |                          |
| 20 | Journal article(s) | Y                               | Y   |                              | N   |              | Low                  |                          |
| 21 | Journal article(s) | Y                               | Y   |                              | N   |              | Low                  |                          |
| 22 | Journal article(s) | Y                               | Y   |                              | N   |              | Low                  |                          |
| 23 | Journal article(s) | Y                               | Y   |                              | N   |              | Low                  |                          |
| 24 | Journal article(s) | Y                               | PY  |                              | N   |              | Low                  |                          |
| 25 | Journal article(s) | Y                               | PY  |                              | N   |              | Low                  |                          |
| 26 | Journal article(s) | Y                               | PY  |                              | N   |              | Low                  |                          |
| 27 | Journal article(s) | Y                               | PY  |                              | N   |              | Low                  |                          |
| 28 | Journal article(s) | Y                               | Y   |                              | N   |              | Low                  |                          |
| 29 | Journal article(s) | Y                               | PY  |                              | N   |              | Low                  |                          |
| 30 | Journal article(s) | Y                               | Y   |                              | N   |              | Low                  |                          |
| 31 | Journal article(s) | Y                               | Y   |                              | N   |              | Low                  |                          |
| 32 | Journal article(s) | Y                               | Y   |                              | N   |              | Low                  |                          |
| 33 | Journal article(s) | PY                              | PN  |                              | N   |              | High                 |                          |

|    | U                | V                     | W                     | X   | Y   | Z                | AA  | AB           | AC  | AD           | AE  |
|----|------------------|-----------------------|-----------------------|-----|-----|------------------|-----|--------------|-----|--------------|-----|
| 1  |                  |                       |                       |     |     |                  |     |              |     |              |     |
| 2  | 1.0 General note | 1.0 Optional Question | 1.0 Note for optional | 2.1 | 2.2 | Note for 2.1&2.2 | 2.3 | Note for 2.3 | 2.4 | Note for 2.4 | 2.5 |
| 3  |                  |                       |                       | Y   | Y   |                  | N   |              | NA  |              | NA  |
| 4  |                  |                       |                       | Y   | Y   |                  | N   |              | NA  |              | NA  |
| 5  |                  |                       |                       | Y   | Y   |                  | N   |              | NA  |              | NA  |
| 6  |                  |                       |                       | Y   | Y   |                  | N   |              | NA  |              | NA  |
| 7  |                  |                       |                       | N   | N   |                  | NA  |              | NA  |              | NA  |
| 8  |                  |                       |                       | N   | N   |                  | NA  |              | NA  |              | NA  |
| 9  |                  |                       |                       | NI  | NI  |                  | N   |              | NA  |              | NA  |
| 10 |                  |                       |                       | Y   | N   |                  | N   |              | NA  |              | NA  |
| 11 |                  |                       |                       | Y   | N   |                  | N   |              | NA  |              | NA  |
| 12 |                  |                       |                       | Y   | N   |                  | N   |              | NA  |              | NA  |
| 13 |                  |                       |                       | Y   | Y   |                  | PN  |              | NA  |              | NA  |
| 14 |                  |                       |                       | Y   | N   |                  | N   |              | NA  |              | NA  |
| 15 |                  |                       |                       | Y   | Y   |                  | N   |              | NA  |              | NA  |
| 16 |                  |                       |                       | Y   | Y   |                  | PN  |              | NA  |              | NA  |
| 17 |                  |                       |                       | Y   | Y   |                  | N   |              | NA  |              | NA  |
| 18 |                  |                       |                       | PY  | PY  |                  | N   |              | NA  |              | NA  |
| 19 |                  |                       |                       | PY  | PY  |                  | N   |              | NA  |              | NA  |
| 20 |                  |                       |                       | PY  | PY  |                  | N   |              | NA  |              | NA  |
| 21 |                  |                       |                       | PY  | PY  |                  | N   |              | NA  |              | NA  |
| 22 |                  |                       |                       | Y   | Y   |                  | N   |              | NA  |              | NA  |
| 23 |                  |                       |                       | PY  | PY  |                  | N   |              | NA  |              | NA  |
| 24 |                  |                       |                       | PY  | PY  |                  | N   |              | NA  |              | NA  |
| 25 |                  |                       |                       | Y   | Y   |                  | N   |              | NA  |              | NA  |
| 26 |                  |                       |                       | PY  | PY  |                  | PN  |              | NA  |              | NA  |
| 27 |                  |                       |                       | PY  | PY  |                  | N   |              | NA  |              | NA  |
| 28 |                  |                       |                       | Y   | Y   |                  | N   |              | NA  |              | NA  |
| 29 |                  |                       |                       | Y   | Y   |                  | N   |              | NA  |              | NA  |
| 30 |                  |                       |                       | N   | Y   |                  | N   |              | NA  |              | NA  |
| 31 |                  |                       |                       | Y   | Y   |                  | PN  |              | NA  |              | NA  |
| 32 |                  |                       |                       | Y   | Y   |                  | N   |              | NA  |              | NA  |
| 33 |                  |                       |                       | PY  | PY  |                  | N   |              | NA  |              | NA  |

|    | AF                                                      | AG         | AH                  | AI         | AJ                  | AK                          | AL                              | AM                 | AN                            |
|----|---------------------------------------------------------|------------|---------------------|------------|---------------------|-----------------------------|---------------------------------|--------------------|-------------------------------|
| 1  | <b>Domain 2. Deviations from intended interventions</b> |            |                     |            |                     |                             |                                 |                    |                               |
|    | <b>Note for 2.5</b>                                     | <b>2.6</b> | <b>Note for 2.6</b> | <b>2.7</b> | <b>Note for 2.7</b> | <b>2.0 Algorithm result</b> | <b>2.0 Assessor's Judgement</b> | <b>2.0 General</b> | <b>2.0 Optional Questions</b> |
| 2  |                                                         |            |                     |            |                     |                             |                                 |                    |                               |
| 3  |                                                         | Y          |                     | NA         |                     | Low                         |                                 |                    |                               |
| 4  |                                                         | Y          |                     | NA         |                     | Low                         |                                 |                    |                               |
| 5  |                                                         | Y          |                     | NA         |                     | Low                         |                                 |                    |                               |
| 6  |                                                         | Y          |                     | NA         |                     | Low                         |                                 |                    |                               |
| 7  |                                                         | Y          |                     | NA         |                     | Low                         |                                 |                    |                               |
| 8  |                                                         | Y          |                     | NA         |                     | Low                         |                                 |                    |                               |
| 9  |                                                         | Y          |                     | NA         |                     | Low                         |                                 |                    |                               |
| 10 |                                                         | Y          |                     | NA         |                     | Low                         |                                 |                    |                               |
| 11 |                                                         | Y          |                     | NA         |                     | Low                         |                                 |                    |                               |
| 12 |                                                         | Y          |                     | NA         |                     | Low                         |                                 |                    |                               |
| 13 |                                                         | Y          |                     | NA         |                     | Low                         |                                 |                    |                               |
| 14 |                                                         | Y          |                     | NA         |                     | Low                         |                                 |                    |                               |
| 15 |                                                         | Y          |                     | NA         |                     | Low                         |                                 |                    |                               |
| 16 |                                                         | Y          |                     | NA         |                     | Low                         |                                 |                    |                               |
| 17 |                                                         | Y          |                     | NA         |                     | Low                         |                                 |                    |                               |
| 18 |                                                         | Y          |                     | NA         |                     | Low                         |                                 |                    |                               |
| 19 |                                                         | Y          |                     | NA         |                     | Low                         |                                 |                    |                               |
| 20 |                                                         | Y          |                     | NA         |                     | Low                         |                                 |                    |                               |
| 21 |                                                         | Y          |                     | NA         |                     | Low                         |                                 |                    |                               |
| 22 |                                                         | Y          |                     | NA         |                     | Low                         |                                 |                    |                               |
| 23 |                                                         | Y          |                     | NA         |                     | Low                         |                                 |                    |                               |
| 24 |                                                         | Y          |                     | NA         |                     | Low                         |                                 |                    |                               |
| 25 |                                                         | Y          |                     | NA         |                     | Low                         |                                 |                    |                               |
| 26 |                                                         | Y          |                     | NA         |                     | Low                         |                                 |                    |                               |
| 27 |                                                         | Y          |                     | NA         |                     | Low                         |                                 |                    |                               |
| 28 |                                                         | Y          |                     | NA         |                     | Low                         |                                 |                    |                               |
| 29 |                                                         | Y          |                     | NA         |                     | Low                         |                                 |                    |                               |
| 30 |                                                         | Y          |                     | NA         |                     | Low                         |                                 |                    |                               |
| 31 |                                                         | Y          |                     | NA         |                     | Low                         |                                 |                    |                               |
| 32 |                                                         | Y          |                     | NA         |                     | Low                         |                                 |                    |                               |
| 33 |                                                         | Y          |                     | NA         |                     | Low                         |                                 |                    |                               |

|    | AO                    | AP                             | AQ           | AR  | AS           | AT  | AU               | AV  | AX                   | AY                       |
|----|-----------------------|--------------------------------|--------------|-----|--------------|-----|------------------|-----|----------------------|--------------------------|
| 1  |                       | Domain 3. Missing outcome data |              |     |              |     |                  |     |                      |                          |
| 2  | 2.0 Note for option 2 | 3.1                            | Note for 3.1 | 3.2 | Note for 3.2 | 3.3 | Note for 3.3&3.4 | 3.4 | 3.0 Algorithm result | 3.0 Assessor's judgement |
| 3  | Y                     |                                | NA           |     | NA           |     | NA               |     | Low                  |                          |
| 4  | Y                     |                                | NA           |     | NA           |     | NA               |     | Low                  |                          |
| 5  | Y                     |                                | NA           |     | NA           |     | NA               |     | Low                  |                          |
| 6  | Y                     |                                | NA           |     | NA           |     | NA               |     | Low                  |                          |
| 7  | Y                     |                                | NA           |     | NA           |     | NA               |     | Low                  |                          |
| 8  | Y                     |                                | NA           |     | NA           |     | NA               |     | Low                  |                          |
| 9  | Y                     |                                | NA           |     | NA           |     | NA               |     | Low                  |                          |
| 10 | Y                     |                                | NA           |     | NA           |     | NA               |     | Low                  |                          |
| 11 | Y                     |                                | NA           |     | NA           |     | NA               |     | Low                  |                          |
| 12 | Y                     |                                | NA           |     | NA           |     | NA               |     | Low                  |                          |
| 13 | Y                     |                                | NA           |     | NA           |     | NA               |     | Low                  |                          |
| 14 | Y                     |                                | NA           |     | NA           |     | NA               |     | Low                  |                          |
| 15 | Y                     |                                | NA           |     | NA           |     | NA               |     | Low                  |                          |
| 16 | Y                     |                                | NA           |     | NA           |     | NA               |     | Low                  |                          |
| 17 | Y                     |                                | NA           |     | NA           |     | NA               |     | Low                  |                          |
| 18 | Y                     |                                | NA           |     | NA           |     | NA               |     | Low                  |                          |
| 19 | Y                     |                                | NA           |     | NA           |     | NA               |     | Low                  |                          |
| 20 | Y                     |                                | NA           |     | NA           |     | NA               |     | Low                  |                          |
| 21 | Y                     |                                | NA           |     | NA           |     | NA               |     | Low                  |                          |
| 22 | PY                    |                                | NA           |     | NA           |     | NA               |     | Low                  |                          |
| 23 | Y                     |                                | NA           |     | NA           |     | NA               |     | Low                  |                          |
| 24 | Y                     |                                | NA           |     | NA           |     | NA               |     | Low                  |                          |
| 25 | Y                     |                                | NA           |     | NA           |     | NA               |     | Low                  |                          |
| 26 | Y                     |                                | NA           |     | NA           |     | NA               |     | Low                  |                          |
| 27 | Y                     |                                | NA           |     | NA           |     | NA               |     | Low                  |                          |
| 28 | Y                     |                                | NA           |     | NA           |     | NA               |     | Low                  |                          |
| 29 | Y                     |                                | NA           |     | NA           |     | NA               |     | Low                  |                          |
| 30 | Y                     |                                | NA           |     | NA           |     | NA               |     | Low                  |                          |
| 31 | Y                     |                                | NA           |     | NA           |     | NA               |     | Low                  |                          |
| 32 | Y                     |                                | NA           |     | NA           |     | NA               |     | Low                  |                          |
| 33 | PY                    |                                | NA           |     | NA           |     | NA               |     | Low                  |                          |

|    | AZ                | BA                 | BB                  | BC                 | BD           | BE  | BF           | BG  | BH           | BI  | BJ               | BK  |
|----|-------------------|--------------------|---------------------|--------------------|--------------|-----|--------------|-----|--------------|-----|------------------|-----|
| 1  |                   |                    |                     | Domain 4. Measurer |              |     |              |     |              |     |                  |     |
|    | 3.0 Gerenal notes | 3.0 Optional Quest | 3.0 Note for option | 4.1                | Note for 4.1 | 4.2 | Note for 4.2 | 4.3 | Note for 4.3 | 4.4 | Note for 4.4&4.5 | 4.5 |
| 2  |                   |                    |                     |                    |              |     |              |     |              |     |                  |     |
| 3  |                   |                    |                     | N                  |              | N   |              | N   |              | NA  |                  | NA  |
| 4  |                   |                    |                     | N                  |              | N   |              | N   |              | NA  |                  | NA  |
| 5  |                   |                    |                     | N                  |              | N   |              | N   |              | NA  |                  | NA  |
| 6  |                   |                    |                     | N                  |              | N   |              | N   |              | NA  |                  | NA  |
| 7  |                   |                    |                     | N                  |              | N   |              | N   |              | NA  |                  | NA  |
| 8  |                   |                    |                     | N                  |              | N   |              | N   |              | NA  |                  | NA  |
| 9  |                   |                    |                     | N                  |              | N   |              | N   |              | NA  |                  | NA  |
| 10 |                   |                    |                     | N                  |              | N   |              | N   |              | NA  |                  | NA  |
| 11 |                   |                    |                     | N                  |              | N   |              | N   |              | NA  |                  | NA  |
| 12 |                   |                    |                     | N                  |              | N   |              | N   |              | NA  |                  | NA  |
| 13 |                   |                    |                     | PN                 |              | PN  |              | PN  |              | NA  |                  | NA  |
| 14 |                   |                    |                     | N                  |              | N   |              | N   |              | NA  |                  | NA  |
| 15 |                   |                    |                     | N                  |              | N   |              | N   |              | NA  |                  | NA  |
| 16 |                   |                    |                     | N                  |              | N   |              | Y   |              | Y   |                  | N   |
| 17 |                   |                    |                     | N                  |              | N   |              | N   |              | NA  |                  | NA  |
| 18 |                   |                    |                     | N                  |              | N   |              | N   |              | NA  |                  | NA  |
| 19 |                   |                    |                     | N                  |              | N   |              | N   |              | NA  |                  | NA  |
| 20 |                   |                    |                     | PN                 |              | PN  |              | N   |              | NA  |                  | NA  |
| 21 |                   |                    |                     | N                  |              | PN  |              | PN  |              | NA  |                  | NA  |
| 22 |                   |                    |                     | N                  |              | PN  |              | PN  |              | NA  |                  | NA  |
| 23 |                   |                    |                     | N                  |              | N   |              | PN  |              | NA  |                  | NA  |
| 24 |                   |                    |                     | N                  |              | PN  |              | PN  |              | NA  |                  | NA  |
| 25 |                   |                    |                     | N                  |              | PN  |              | PY  |              | PN  |                  | NA  |
| 26 |                   |                    |                     | PN                 |              | PN  |              | PN  |              | NA  |                  | NA  |
| 27 |                   |                    |                     | N                  |              | PN  |              | N   |              | NA  |                  | NA  |
| 28 |                   |                    |                     | N                  |              | PN  |              | N   |              | NA  |                  | NA  |
| 29 |                   |                    |                     | N                  |              | PN  |              | N   |              | NA  |                  | NA  |
| 30 |                   |                    |                     | N                  |              | PN  |              | N   |              | NA  |                  | NA  |
| 31 |                   |                    |                     | N                  |              | PN  |              | N   |              | NA  |                  | NA  |
| 32 |                   |                    |                     | N                  |              | PN  |              | N   |              | NA  |                  | NA  |
| 33 |                   |                    |                     | N                  |              | PN  |              | PN  |              | NA  |                  | NA  |

|    | BM                   | BN                       | BO               | BP                 | BQ                    | BR  | BS                  | BT  | BU           |
|----|----------------------|--------------------------|------------------|--------------------|-----------------------|-----|---------------------|-----|--------------|
| 1  | nment of the outcome |                          |                  |                    |                       |     |                     |     |              |
| 2  | 4.0 Algorithm result | 4.0 Assessor's Judgement | 4.0 General note | 4.0 Optional Quest | 4.0 Note for optional | 5.1 | Note for 5.1        | 5.2 | Note for 5.2 |
| 3  | Low                  |                          |                  |                    |                       | Y   |                     | N   |              |
| 4  | Low                  |                          |                  |                    |                       | NI  |                     | N   |              |
| 5  | Low                  |                          |                  |                    |                       | Y   |                     | N   |              |
| 6  | Low                  |                          |                  |                    |                       | Y   |                     | N   |              |
| 7  | Low                  |                          |                  |                    |                       | Y   |                     | Y   |              |
| 8  | Low                  |                          |                  |                    |                       | Y   |                     | N   |              |
| 9  | Low                  |                          |                  |                    |                       | Y   |                     | Y   |              |
| 10 | Low                  |                          |                  |                    |                       | Y   |                     | N   |              |
| 11 |                      |                          |                  |                    |                       | Y   | general diabetes n  | N   |              |
| 12 | Low                  |                          |                  |                    |                       | Y   | general diabetes, r | N   |              |
| 13 | Low                  |                          |                  |                    |                       | Y   |                     | N   |              |
| 14 | Low                  |                          |                  |                    |                       | Y   |                     | Y   |              |
| 15 | Low                  |                          |                  |                    |                       | Y   |                     | PN  |              |
| 16 | Some concerns        |                          |                  |                    |                       | Y   |                     | N   |              |
| 17 | Low                  |                          |                  |                    |                       | Y   | does not specify t1 | N   |              |
| 18 | Low                  |                          |                  |                    |                       | Y   | general diabetes re | N   |              |
| 19 | Low                  |                          |                  |                    |                       | Y   |                     | PN  |              |
| 20 | Low                  |                          |                  |                    |                       | Y   |                     | PN  |              |
| 21 | Low                  |                          |                  |                    |                       | Y   |                     | PN  |              |
| 22 | Low                  |                          |                  |                    |                       | Y   |                     | PN  |              |
| 23 | Low                  |                          |                  |                    |                       | Y   |                     | PN  |              |
| 24 | Low                  |                          |                  |                    |                       | Y   | general diabetes re | PN  |              |
| 25 | Low                  |                          |                  |                    |                       | Y   |                     | PN  |              |
| 26 | Low                  |                          |                  |                    |                       | Y   |                     | PN  |              |
| 27 | Low                  |                          |                  |                    |                       | Y   |                     | N   |              |
| 28 | Low                  |                          |                  |                    |                       | Y   |                     | N   |              |
| 29 | Low                  |                          |                  |                    |                       | Y   |                     | N   |              |
| 30 | Low                  |                          |                  |                    |                       | Y   |                     | N   |              |
| 31 | Low                  |                          |                  |                    |                       | Y   |                     | N   |              |
| 32 | Low                  |                          |                  |                    |                       | Y   | general diabetes re | N   |              |
| 33 | Low                  |                          |                  |                    |                       | Y   |                     | Y   |              |



|    | BV                                         | BW           | BX                   | BY                       | BZ          | CA                 | CB                    | CC                       |
|----|--------------------------------------------|--------------|----------------------|--------------------------|-------------|--------------------|-----------------------|--------------------------|
| 1  | Domain 5. Selection of the reported result |              |                      |                          |             |                    |                       | Algorithm's overall Judg |
|    | 5.3                                        | Note for 5.3 | 5.0 Algorithm result | 5.0 Assessor's Judgement | 5.0 General | 5.0 Optional Quest | 5.0 Note for optional |                          |
| 2  |                                            |              |                      |                          |             |                    |                       |                          |
| 3  | N                                          |              | Low                  |                          |             |                    |                       |                          |
| 4  | N                                          |              | Some concerns        |                          |             |                    |                       |                          |
| 5  | N                                          |              | Low                  |                          |             |                    |                       |                          |
| 6  | N                                          |              | Low                  |                          |             |                    |                       |                          |
| 7  | N                                          |              | High                 |                          |             |                    |                       |                          |
| 8  | N                                          |              | Low                  |                          |             |                    |                       |                          |
| 9  | N                                          |              | High                 |                          |             |                    |                       |                          |
| 10 | N                                          |              | High                 |                          |             |                    |                       |                          |
| 11 | N                                          |              | Low                  |                          |             |                    |                       |                          |
| 12 | N                                          |              | Low                  |                          |             |                    |                       |                          |
| 13 | PN                                         |              | Low                  |                          |             |                    |                       |                          |
| 14 | Y                                          |              |                      |                          |             |                    |                       |                          |
| 15 | N                                          |              | Low                  |                          |             |                    |                       |                          |
| 16 | N                                          |              | Low                  |                          |             |                    |                       |                          |
| 17 | N                                          |              | Low                  |                          |             |                    |                       |                          |
| 18 | N                                          |              | Low                  |                          |             |                    |                       |                          |
| 19 | PN                                         |              | Low                  |                          |             |                    |                       |                          |
| 20 | PN                                         |              | Low                  |                          |             |                    |                       |                          |
| 21 | PN                                         |              | Low                  |                          |             |                    |                       |                          |
| 22 | PN                                         |              | Low                  |                          |             |                    |                       |                          |
| 23 | PN                                         |              | Low                  |                          |             |                    |                       |                          |
| 24 | PN                                         |              | Low                  |                          |             |                    |                       |                          |
| 25 | PN                                         |              | Low                  |                          |             |                    |                       |                          |
| 26 | PN                                         |              | Low                  |                          |             |                    |                       |                          |
| 27 | N                                          |              | Low                  |                          |             |                    |                       |                          |
| 28 | N                                          |              | Low                  |                          |             |                    |                       |                          |
| 29 | N                                          |              | Low                  |                          |             |                    |                       |                          |
| 30 | N                                          |              | Low                  |                          |             |                    |                       |                          |
| 31 | N                                          |              | Low                  |                          |             |                    |                       |                          |
| 32 | N                                          |              | Low                  |                          |             |                    |                       |                          |
| 33 | N                                          |              | High                 |                          |             |                    |                       |                          |

|    | CD                       | CE               | CF                    | CG                  | CH | CI |
|----|--------------------------|------------------|-----------------------|---------------------|----|----|
| 1  | Domain 6. Overall Bias   |                  |                       |                     |    |    |
|    | Assessor's overall Judge | 6.0 General Note | 6.0 Optional Question | 6.0 Note for option |    |    |
| 2  |                          |                  |                       |                     |    |    |
| 3  | Low                      |                  |                       |                     |    |    |
| 4  | Low                      |                  |                       |                     |    |    |
| 5  | Low                      |                  |                       |                     |    |    |
| 6  | Low                      |                  |                       |                     |    |    |
| 7  | Low                      |                  |                       |                     |    |    |
| 8  | Low                      |                  |                       |                     |    |    |
| 9  | Low                      |                  |                       |                     |    |    |
| 10 | Low                      |                  |                       |                     |    |    |
| 11 | Low                      |                  |                       |                     |    |    |
| 12 | Low                      |                  |                       |                     |    |    |
| 13 | Low                      |                  |                       |                     |    |    |
| 14 | Low                      |                  |                       |                     |    |    |
| 15 | Low                      |                  |                       |                     |    |    |
| 16 | Low                      |                  |                       |                     |    |    |
| 17 | Low                      |                  |                       |                     |    |    |
| 18 | Low                      |                  |                       |                     |    |    |
| 19 | Low                      |                  |                       |                     |    |    |
| 20 | Low                      |                  |                       |                     |    |    |
| 21 | Low                      |                  |                       |                     |    |    |
| 22 | Low                      |                  |                       |                     |    |    |
| 23 | Low                      |                  |                       |                     |    |    |
| 24 | Low                      |                  |                       |                     |    |    |
| 25 | Low                      |                  |                       |                     |    |    |
| 26 | Low                      |                  |                       |                     |    |    |
| 27 | Low                      |                  |                       |                     |    |    |
| 28 | Low                      |                  |                       |                     |    |    |
| 29 | Low                      |                  |                       |                     |    |    |
| 30 | Low                      |                  |                       |                     |    |    |
| 31 | Low                      |                  |                       |                     |    |    |
| 32 | Low                      |                  |                       |                     |    |    |
| 33 | Low                      |                  |                       |                     |    |    |
