# Supplementary material
Source: publisher figshare collection journal article supplement (https://diabetesjournals.figshare.com/articles/dataset/_/27047923)

## Supplement 3: Sensitivity Analyses Eliminating Studies Including Lay Professionals

### Training Sensitivity Analysis 1: Hemoglobin A1C Outcome

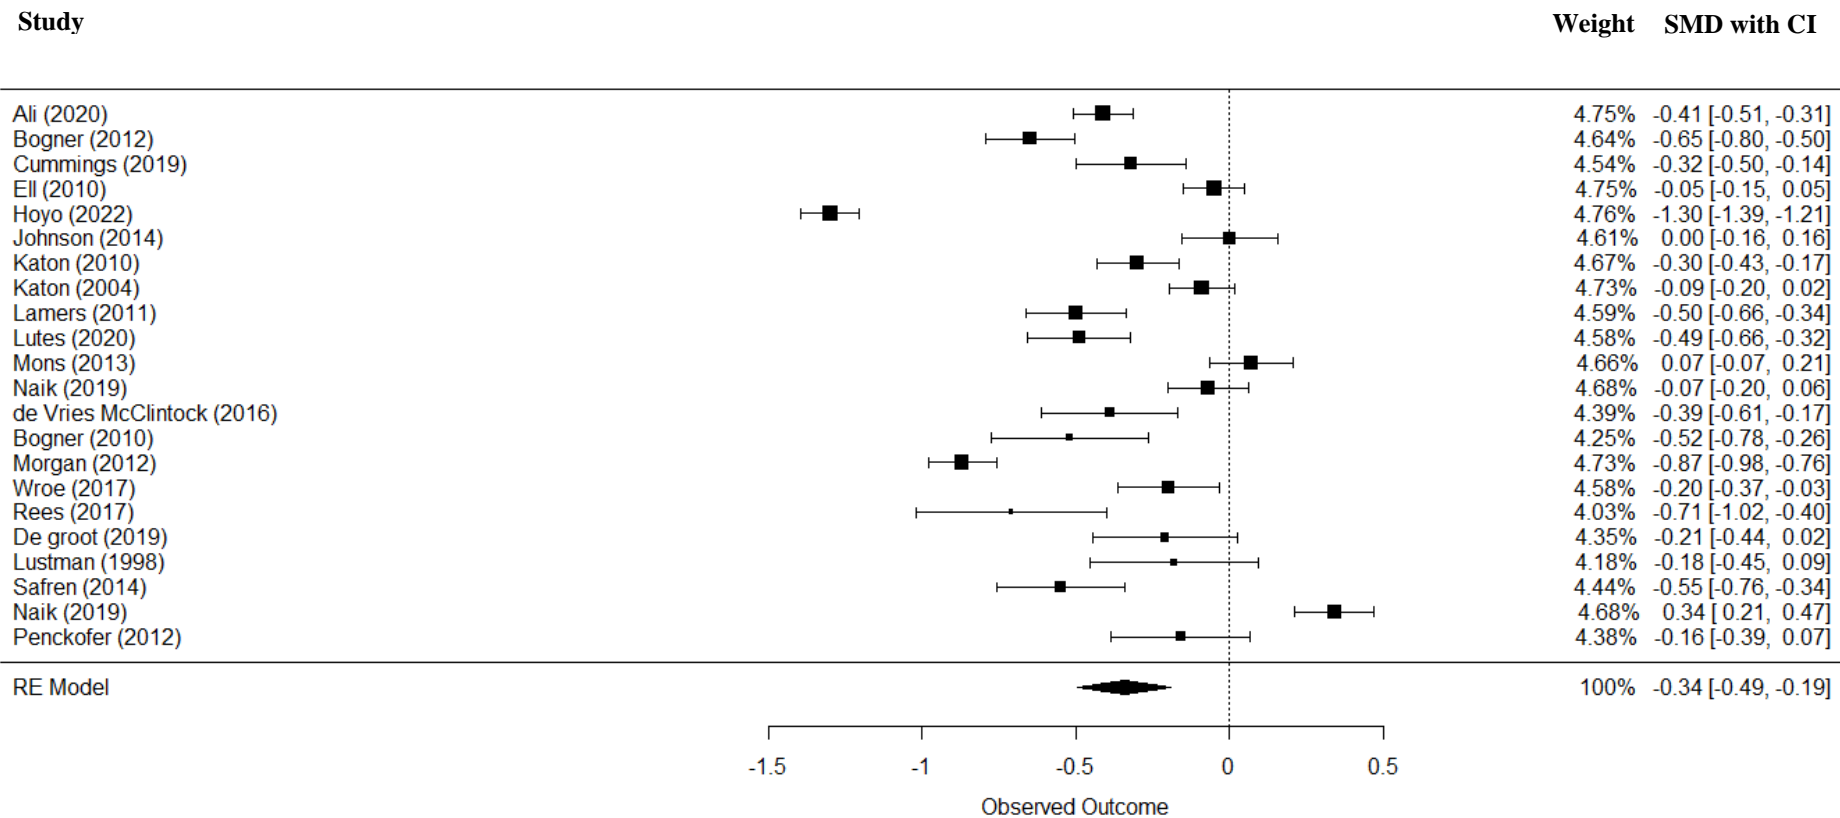

## Training Sensitivity Analysis 2: Depression Outcome

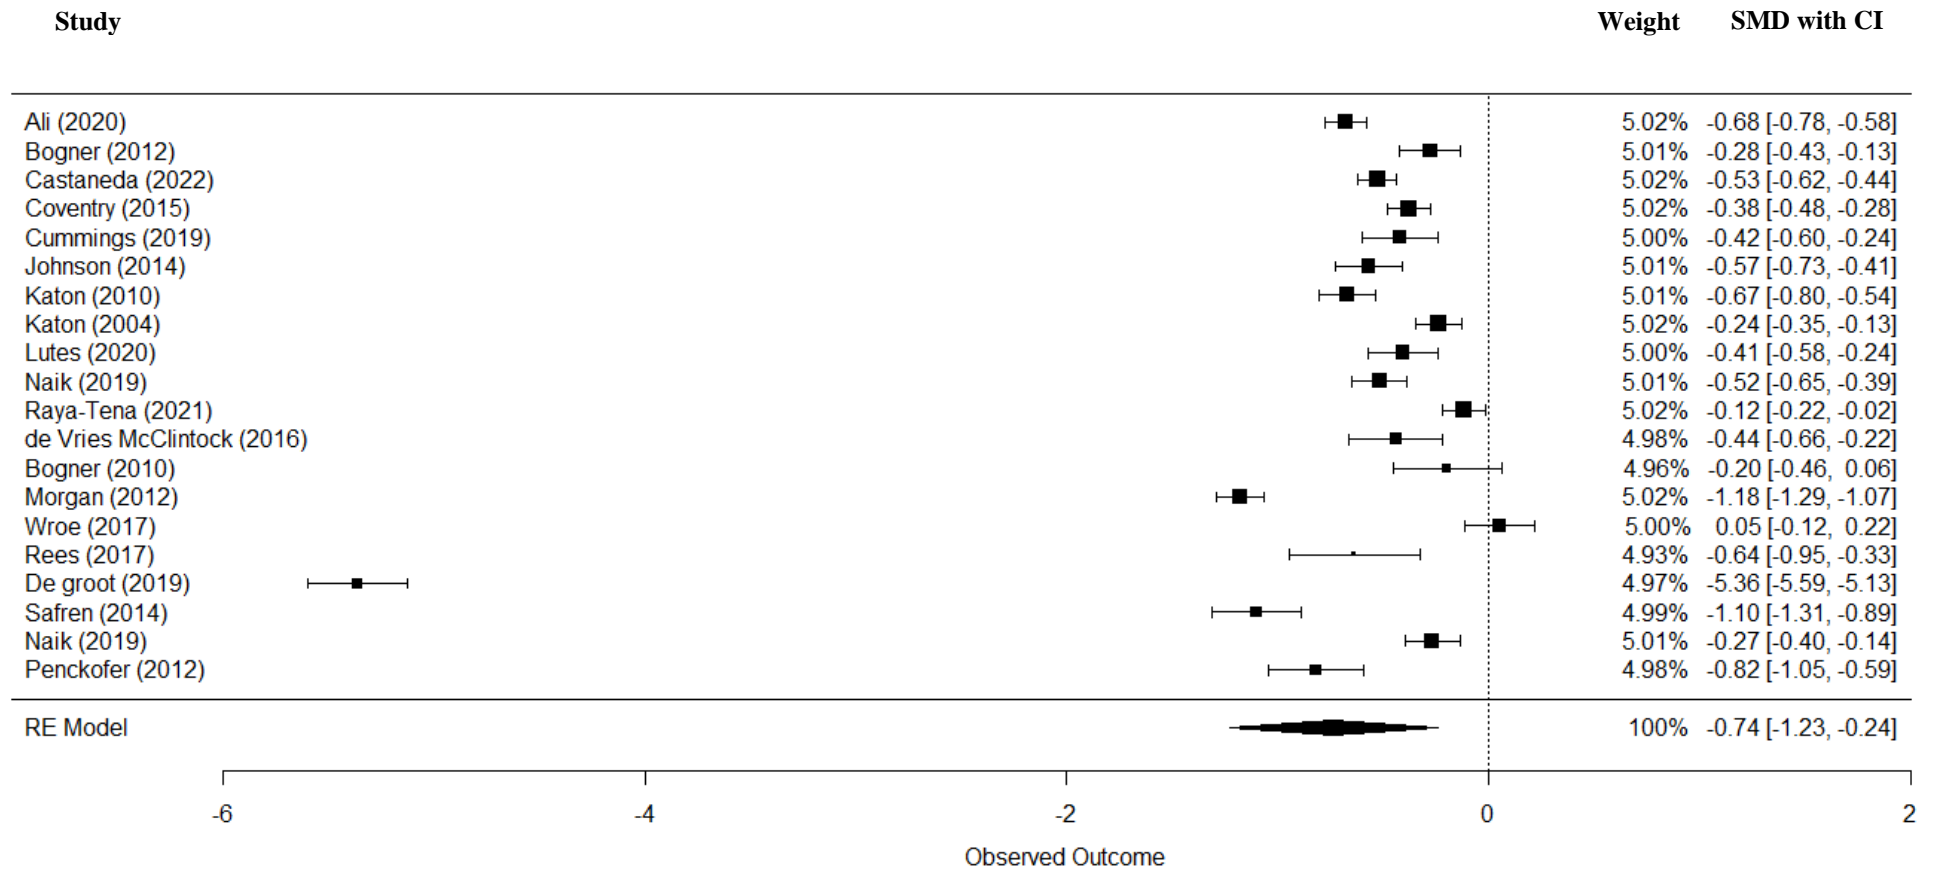

Supplement: Supplementary file 4 [file 1]
