# Supplementary material
Source: publisher figshare collection journal article supplement (https://diabetesjournals.figshare.com/articles/dataset/_/27047923)

Figure 3: Funnel Plots to Analyze Publication Bias

Hemoglobin A1C Funnel Plot

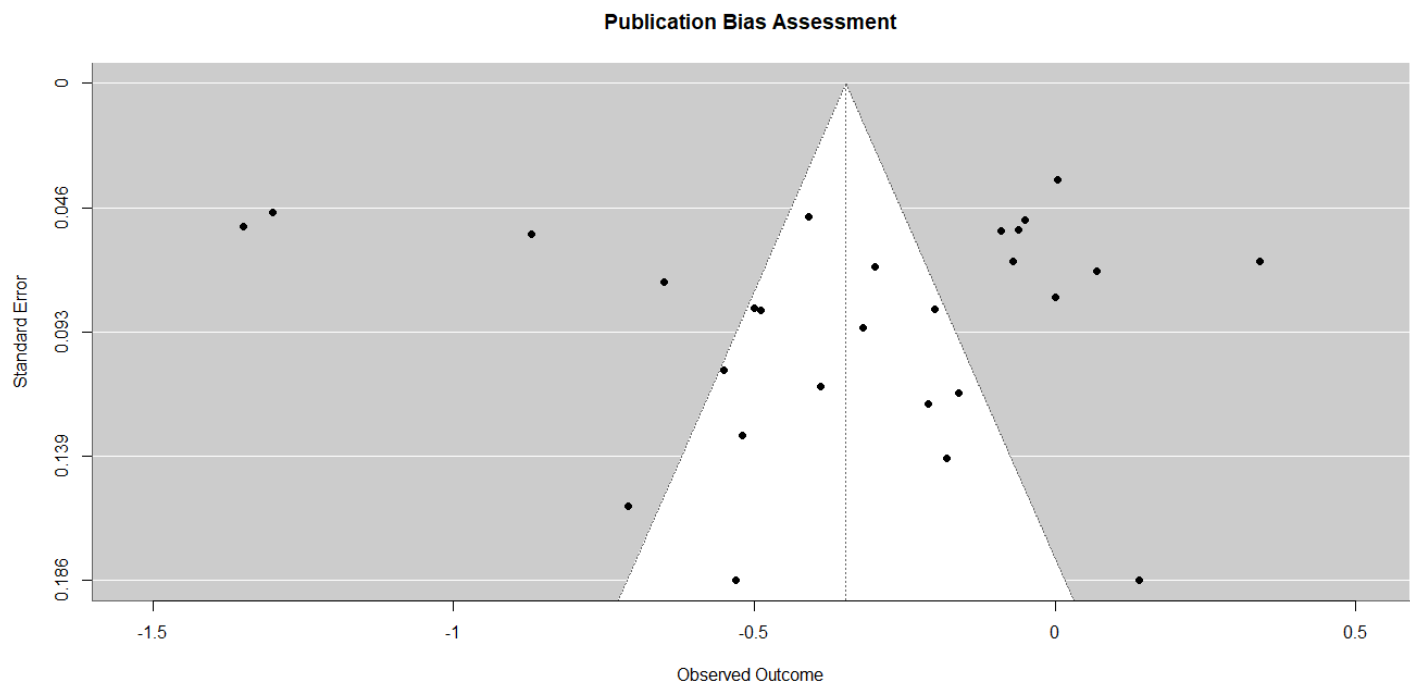

Depression Funnel Plot

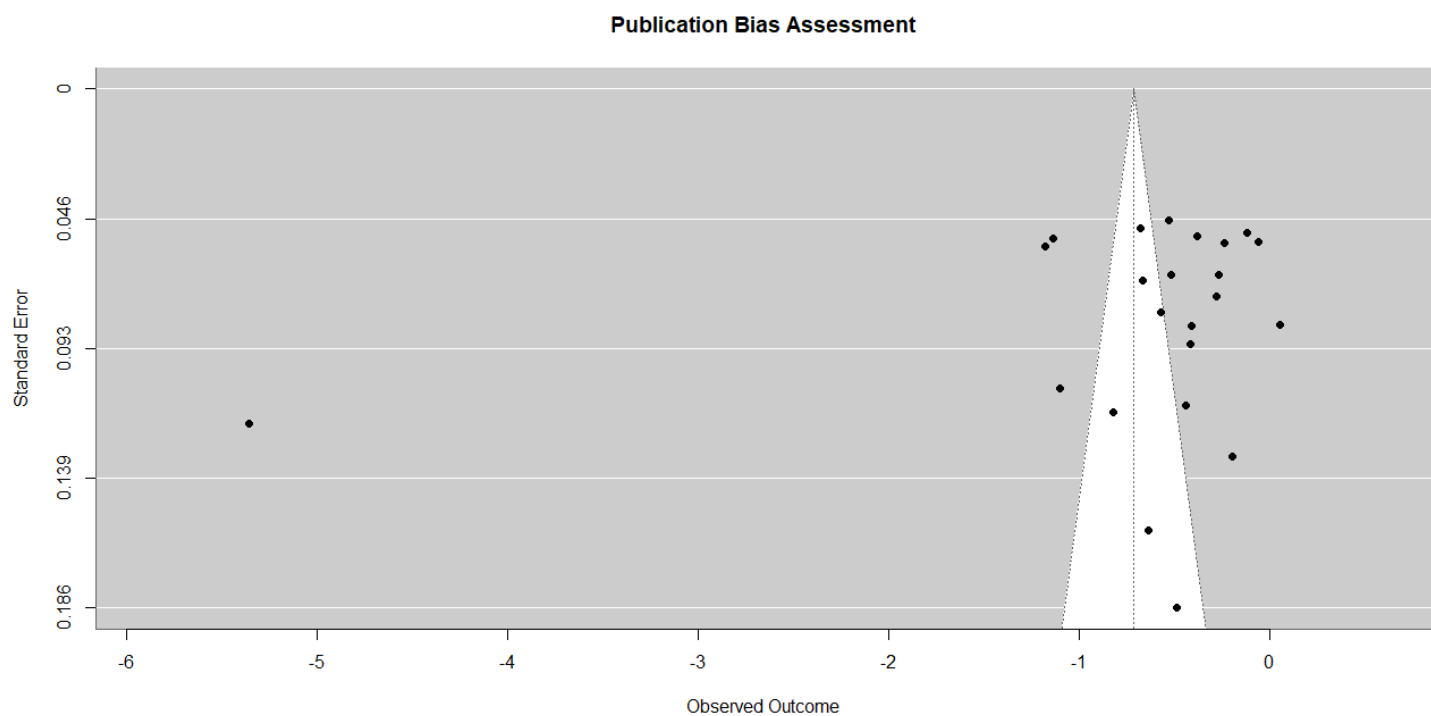

Supplement: Supplementary file 5 [file 1]
